# Supplementary material for: Key components of shared decision making models: a systematic review
Source: PubMed Central journal article supplement — BMJ Open. 2019 Dec 17;9(12):e031763. doi: 10.1136/bmjopen-2019-031763 (PMC6937101; doi:10.1136/bmjopen-2019-031763), 2019-12-17
Supplement: bmjopen-2019-031763supp001.pdf [file bmjopen-2019-031763supp001.pdf]

## Appendix A: Search strategy

### PubMed

(shared decision[ti] OR shared decision[ot] OR shared decisions[ti] OR shared decisions[ot] OR shared decisionmaking[ti] OR shared decisionmaking[ot] OR SDM[ti] OR SDM[ot] OR Shared medical decision[ti] OR Shared medical decision[ot] OR Shared treatment decision[ti] OR Shared treatment decision[ot] OR Shared medical decisions[ti] OR Shared medical decisions[ot] OR Shared treatment decisions[ti] OR Shared treatment decisions[ot] OR Shared clinical decision[ti] OR Shared clinical decision[ot] OR Shared clinical decisions[ti] OR Shared clinical decisions[ot])  
 NOT ("addresses"[Publication Type] OR "biography"[Publication Type] OR "comment"[Publication Type] OR "directory"[Publication Type] OR "editorial"[Publication Type] OR "festschrift"[Publication Type] OR "interview"[Publication Type] OR "lectures"[Publication Type] OR "legal cases"[Publication Type] OR "legislation"[Publication Type] OR "letter"[Publication Type] OR "news"[Publication Type] OR "newspaper article"[Publication Type] OR "patient education handout"[Publication Type] OR "popular works"[Publication Type] OR "congresses"[Publication Type] OR "practice guideline"[Publication Type]) NOT ("animals"[MeSH Terms] NOT "humans"[MeSH Terms])  
 AND english[la]

### Embase

(shared decision\*.ti OR SDM.ti OR Shared medical decision\*.ti OR Shared treatment decision\*.ti OR Shared clinical decision\*.ti OR ((shar\*) ADJ5 (decis\*)).ti) NOT ("editorial"/ OR "letter"/ OR conference abstract.pt OR conference review.pt) NOT (exp "Animals"/ NOT exp "humans"/) AND english.la

### Cochrane

("shared decision" OR "shared decisions" OR "shared decisionmaking" OR "SDM" OR "Shared medical decision" OR "Shared treatment decision" OR "Shared medical decisions" OR "Shared treatment decisions" OR "Shared clinical decision" OR "Shared clinical decisions" OR (share\* AND decis\*)):TI OR ("shared NEXT decision" OR "shared NEXT decisions" OR "shared NEXT decisionmaking" OR "SDM" OR "Shared NEXT medical NEXT decision" OR "Shared NEXT treatment NEXT decision" OR "Shared NEXT medical NEXT decisions" OR "Shared NEXT treatment NEXT decisions" OR "Shared NEXT clinical NEXT decision" OR "Shared NEXT clinical NEXT decisions" OR (share\* NEXT decis\*)):TI

### Emcare

(shared decision\*.ti OR SDM.ti OR Shared medical decision\*.ti OR Shared treatment decision\*.ti OR Shared clinical decision\*.ti OR ((shar\*) ADJ5 (decis\*)).ti) NOT ("editorial"/ OR "letter"/ OR conference abstract.pt OR conference review.pt) NOT (exp "Animals"/ NOT exp "humans"/) AND english.la

**Web of Science**

TI=("shared decision\*" OR "Shared medical decision\*" OR "Shared treatment decision\*" OR "Shared clinical decision\*" OR (shar\* NEAR/5 decis\*)) AND la=english NOT ti=("veterinary" OR "rabbit" OR "rabbits" OR "animal" OR "animals" OR "mouse" OR "mice" OR "rodent" OR "rodents" OR "rat" OR "rats" OR "pig" OR "pigs" OR "porcine" OR "horse" OR "horses" OR "equine" OR "cow" OR "cows" OR "bovine" OR "goat" OR "goats" OR "sheep" OR "ovine" OR "canine" OR "dog" OR "dogs" OR "feline" OR "cat" OR "cats")

[excluding] DOCUMENT TYPES: ( BOOK REVIEW OR NEWS ITEM OR MEETING ABSTRACT OR EDITORIAL MATERIAL )

**PsycINFO**

TI("shared decision\*" OR "Shared medical decision\*" OR "Shared treatment decision\*" OR "Shared clinical decision\*" OR (shar\* N5 decis\*)) NOT TI("veterinary" OR "rabbit" OR "rabbits" OR "animal" OR "animals" OR "mouse" OR "mice" OR "rodent" OR "rodents" OR "rat" OR "rats" OR "pig" OR "pigs" OR "porcine" OR "horse" OR "horses" OR "equine" OR "cow" OR "cows" OR "bovine" OR "goat" OR "goats" OR "sheep" OR "ovine" OR "canine" OR "dog" OR "dogs" OR "feline" OR "cat" OR "cats")

AND la=english

Limiters: Journal Articles (549) / Dissertations (50)

**Academic Search Premier**

TI("shared decision\*" OR "Shared medical decision\*" OR "Shared treatment decision\*" OR "Shared clinical decision\*" OR (shar\* N5 decis\*)) NOT TI("veterinary" OR "rabbit" OR "rabbits" OR "animal" OR "animals" OR "mouse" OR "mice" OR "rodent" OR "rodents" OR "rat" OR "rats" OR "pig" OR "pigs" OR "porcine" OR "horse" OR "horses" OR "equine" OR "cow" OR "cows" OR "bovine" OR "goat" OR "goats" OR "sheep" OR "ovine" OR "canine" OR "dog" OR "dogs" OR "feline" OR "cat" OR "cats")

AND la=english

Limiters: Article
